# Supplementary material for: Spatial distribution and source identification of metal contaminants in the surface soil of Matehuala, Mexico based on positive matrix factorization model and GIS techniques
Source: Frontiers journal article supplement (doi:10.3389/fsoil.2022.1041377), 2022-12-06
Supplement: Data_Sheet_1.DOCX [file Data_Sheet_1.DOCX]

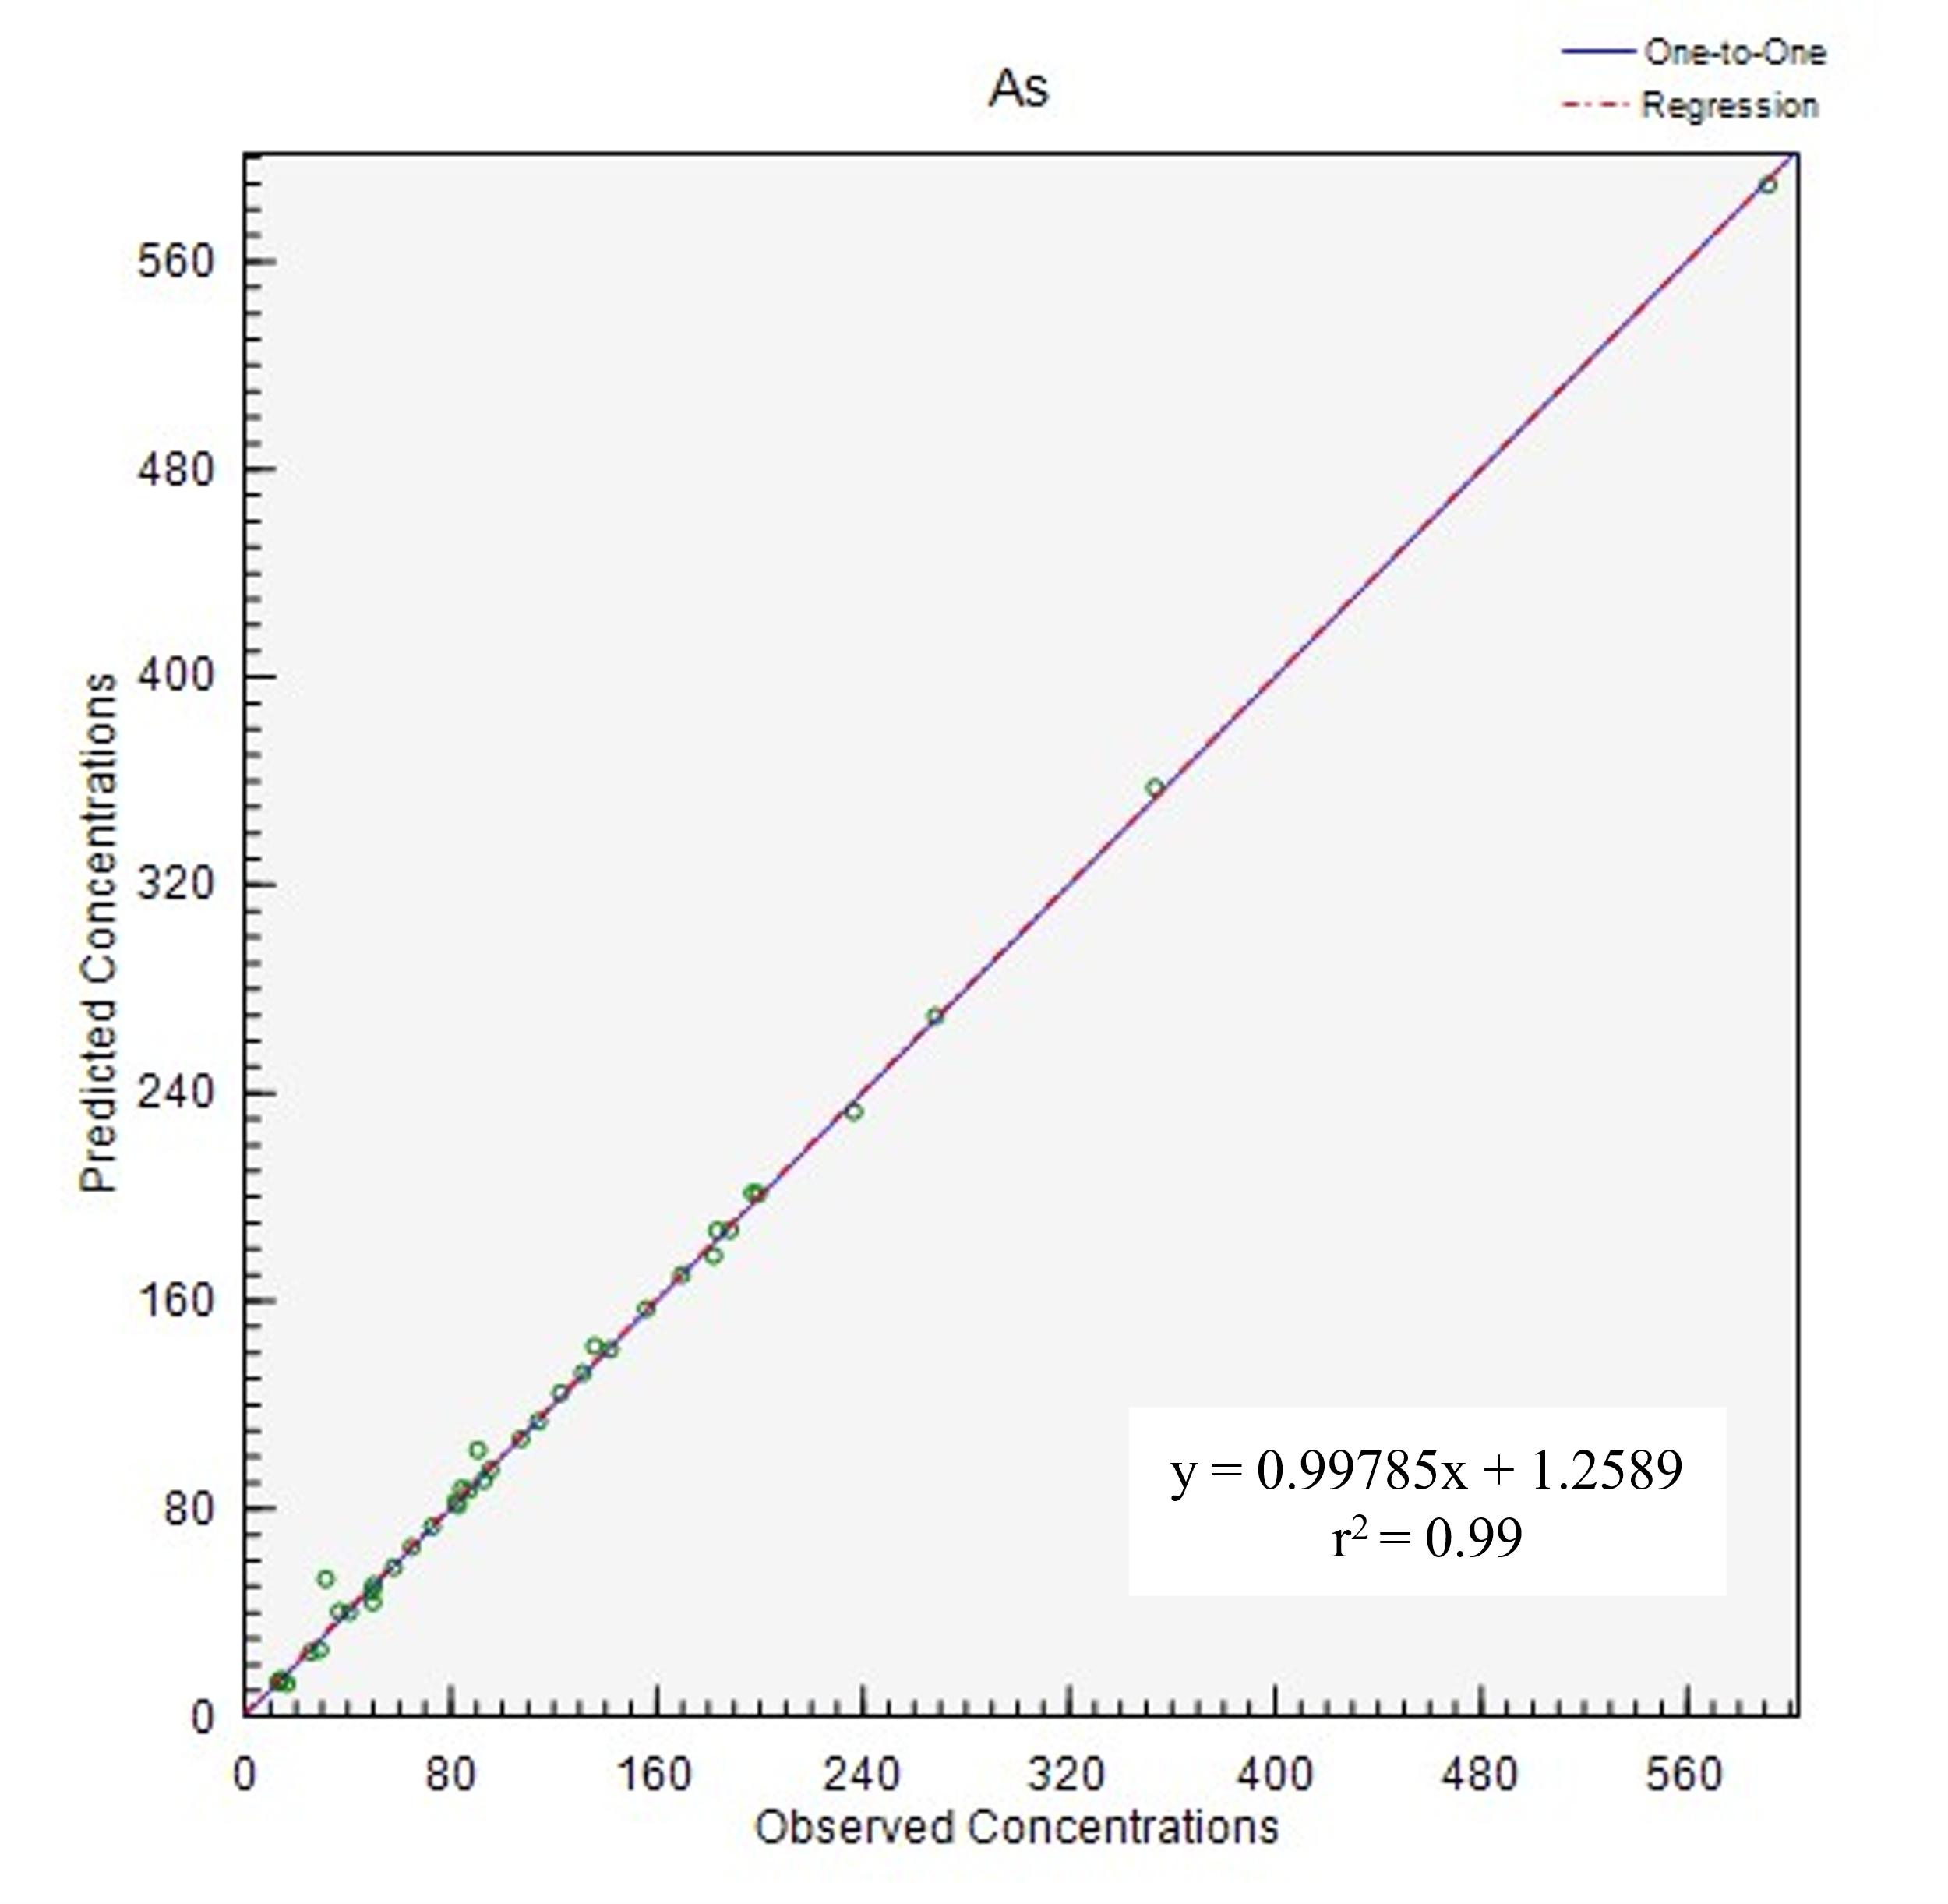

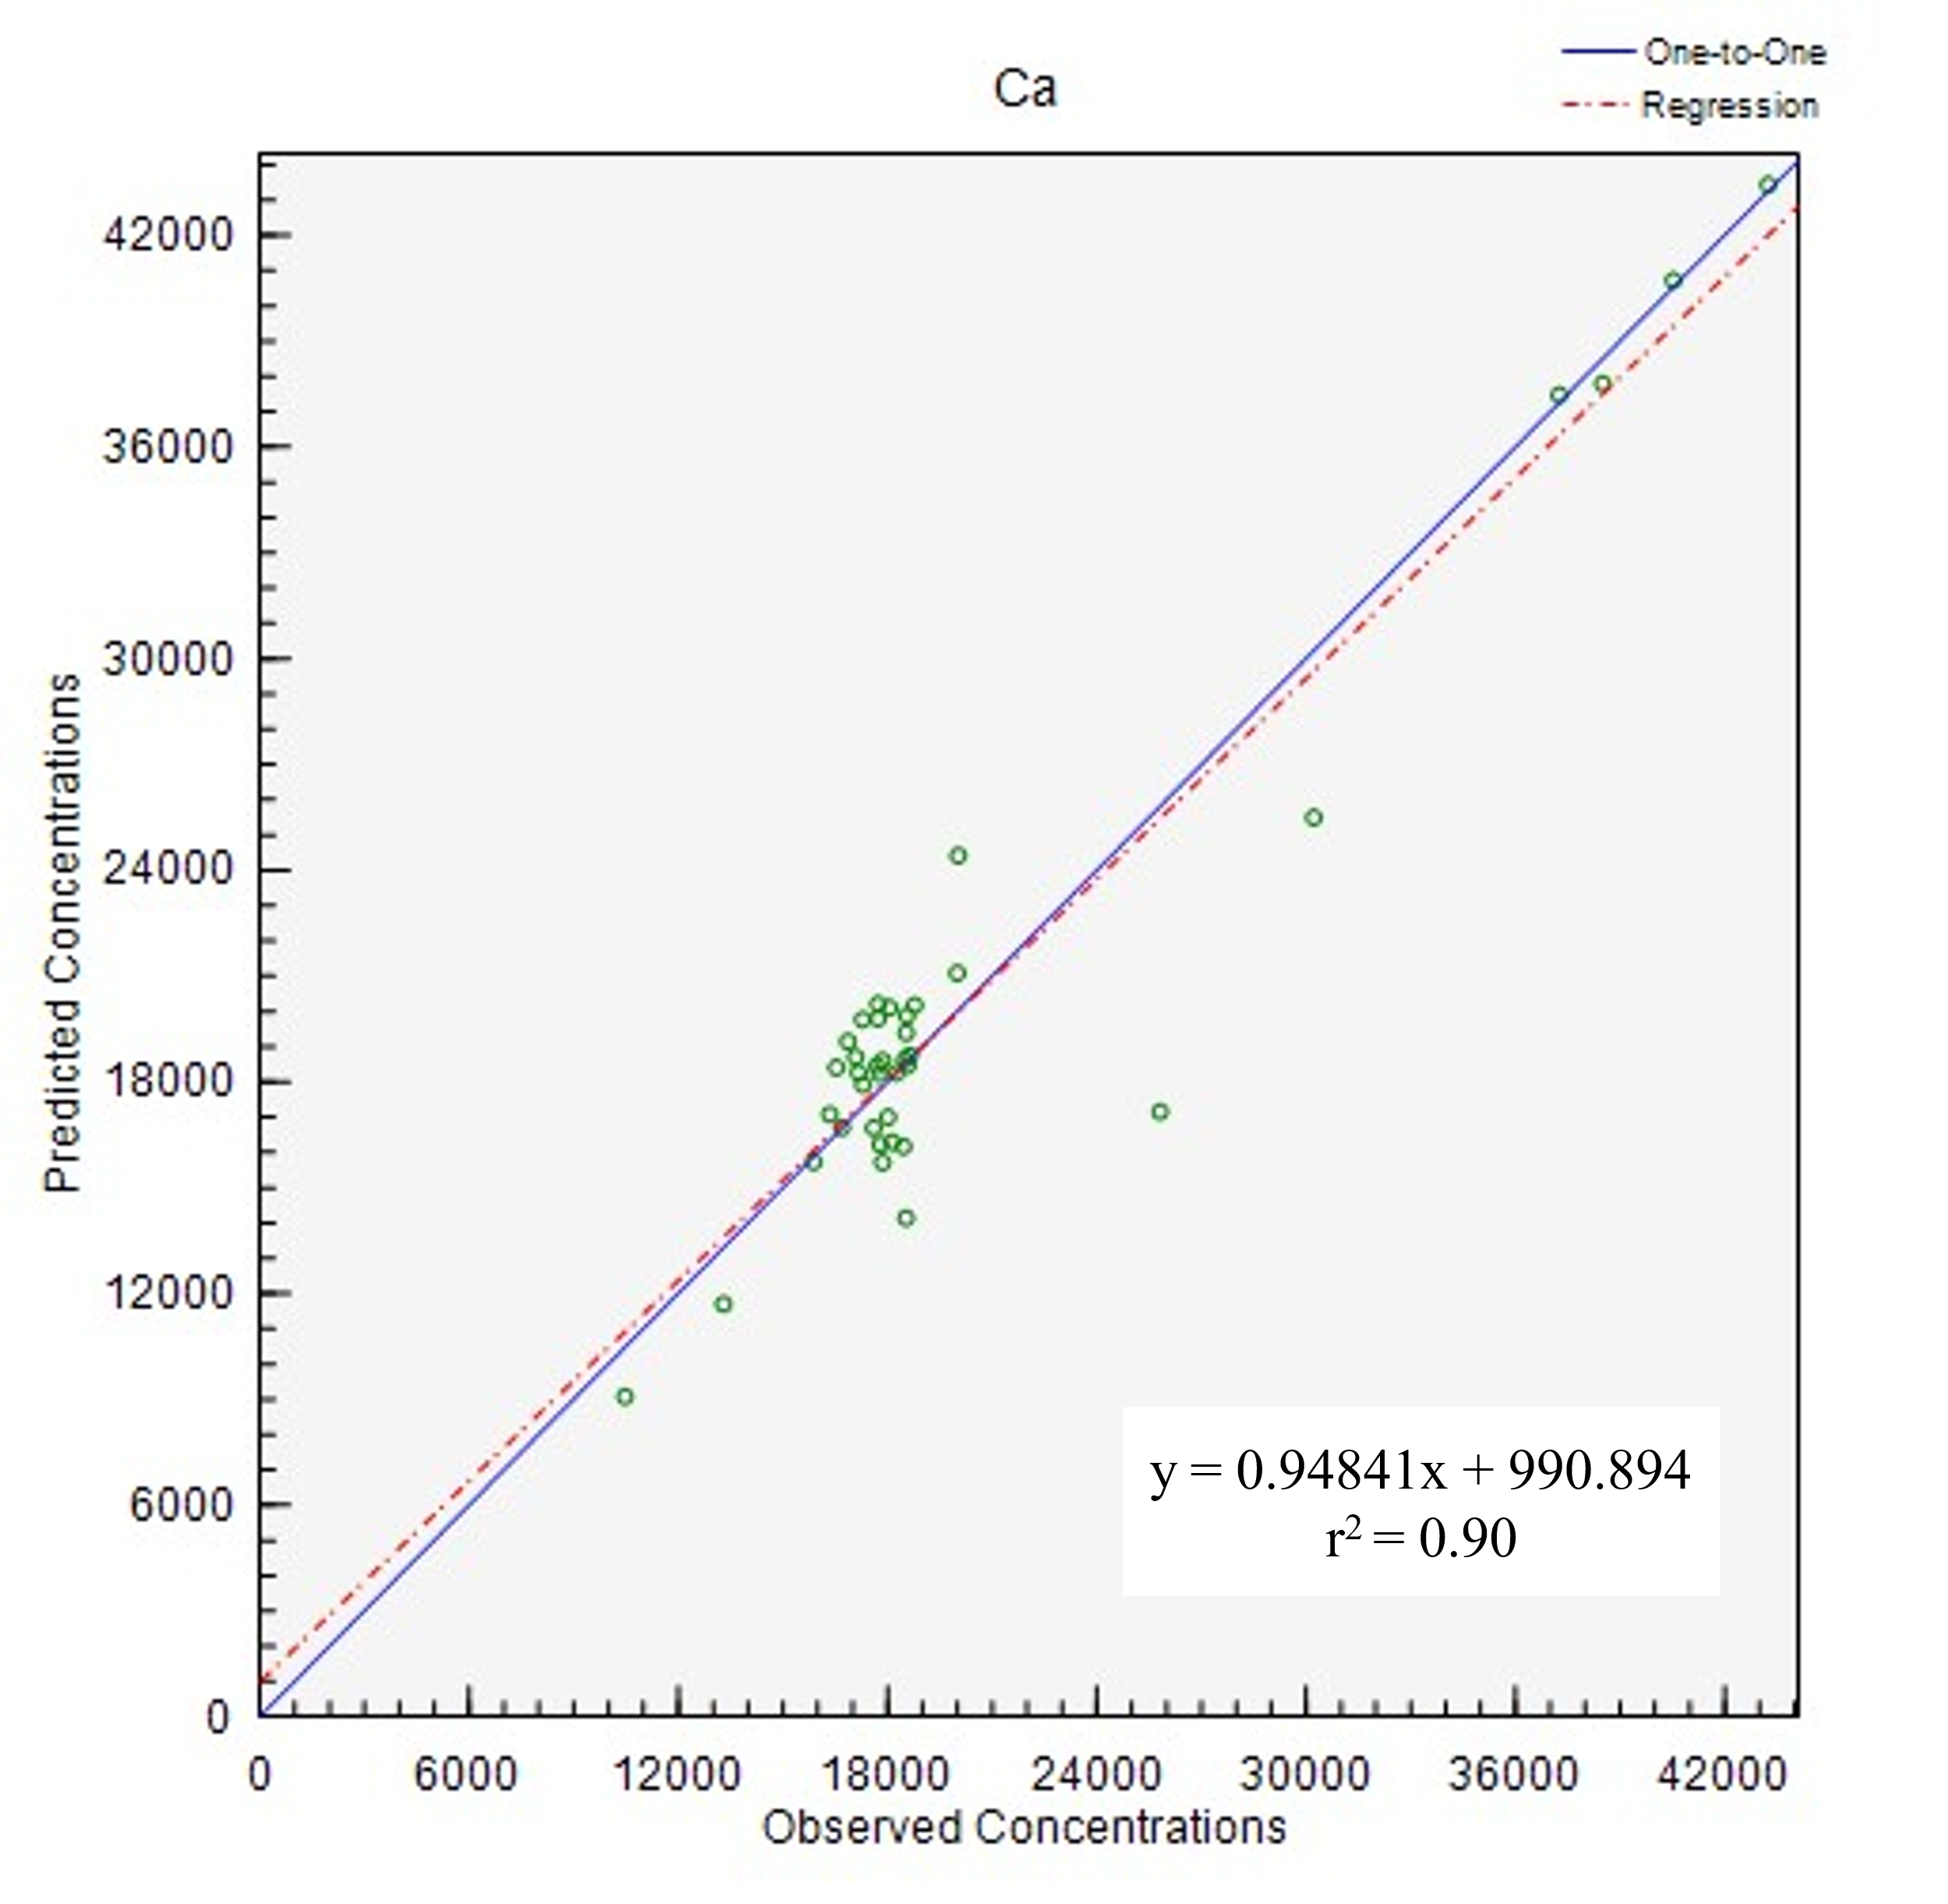

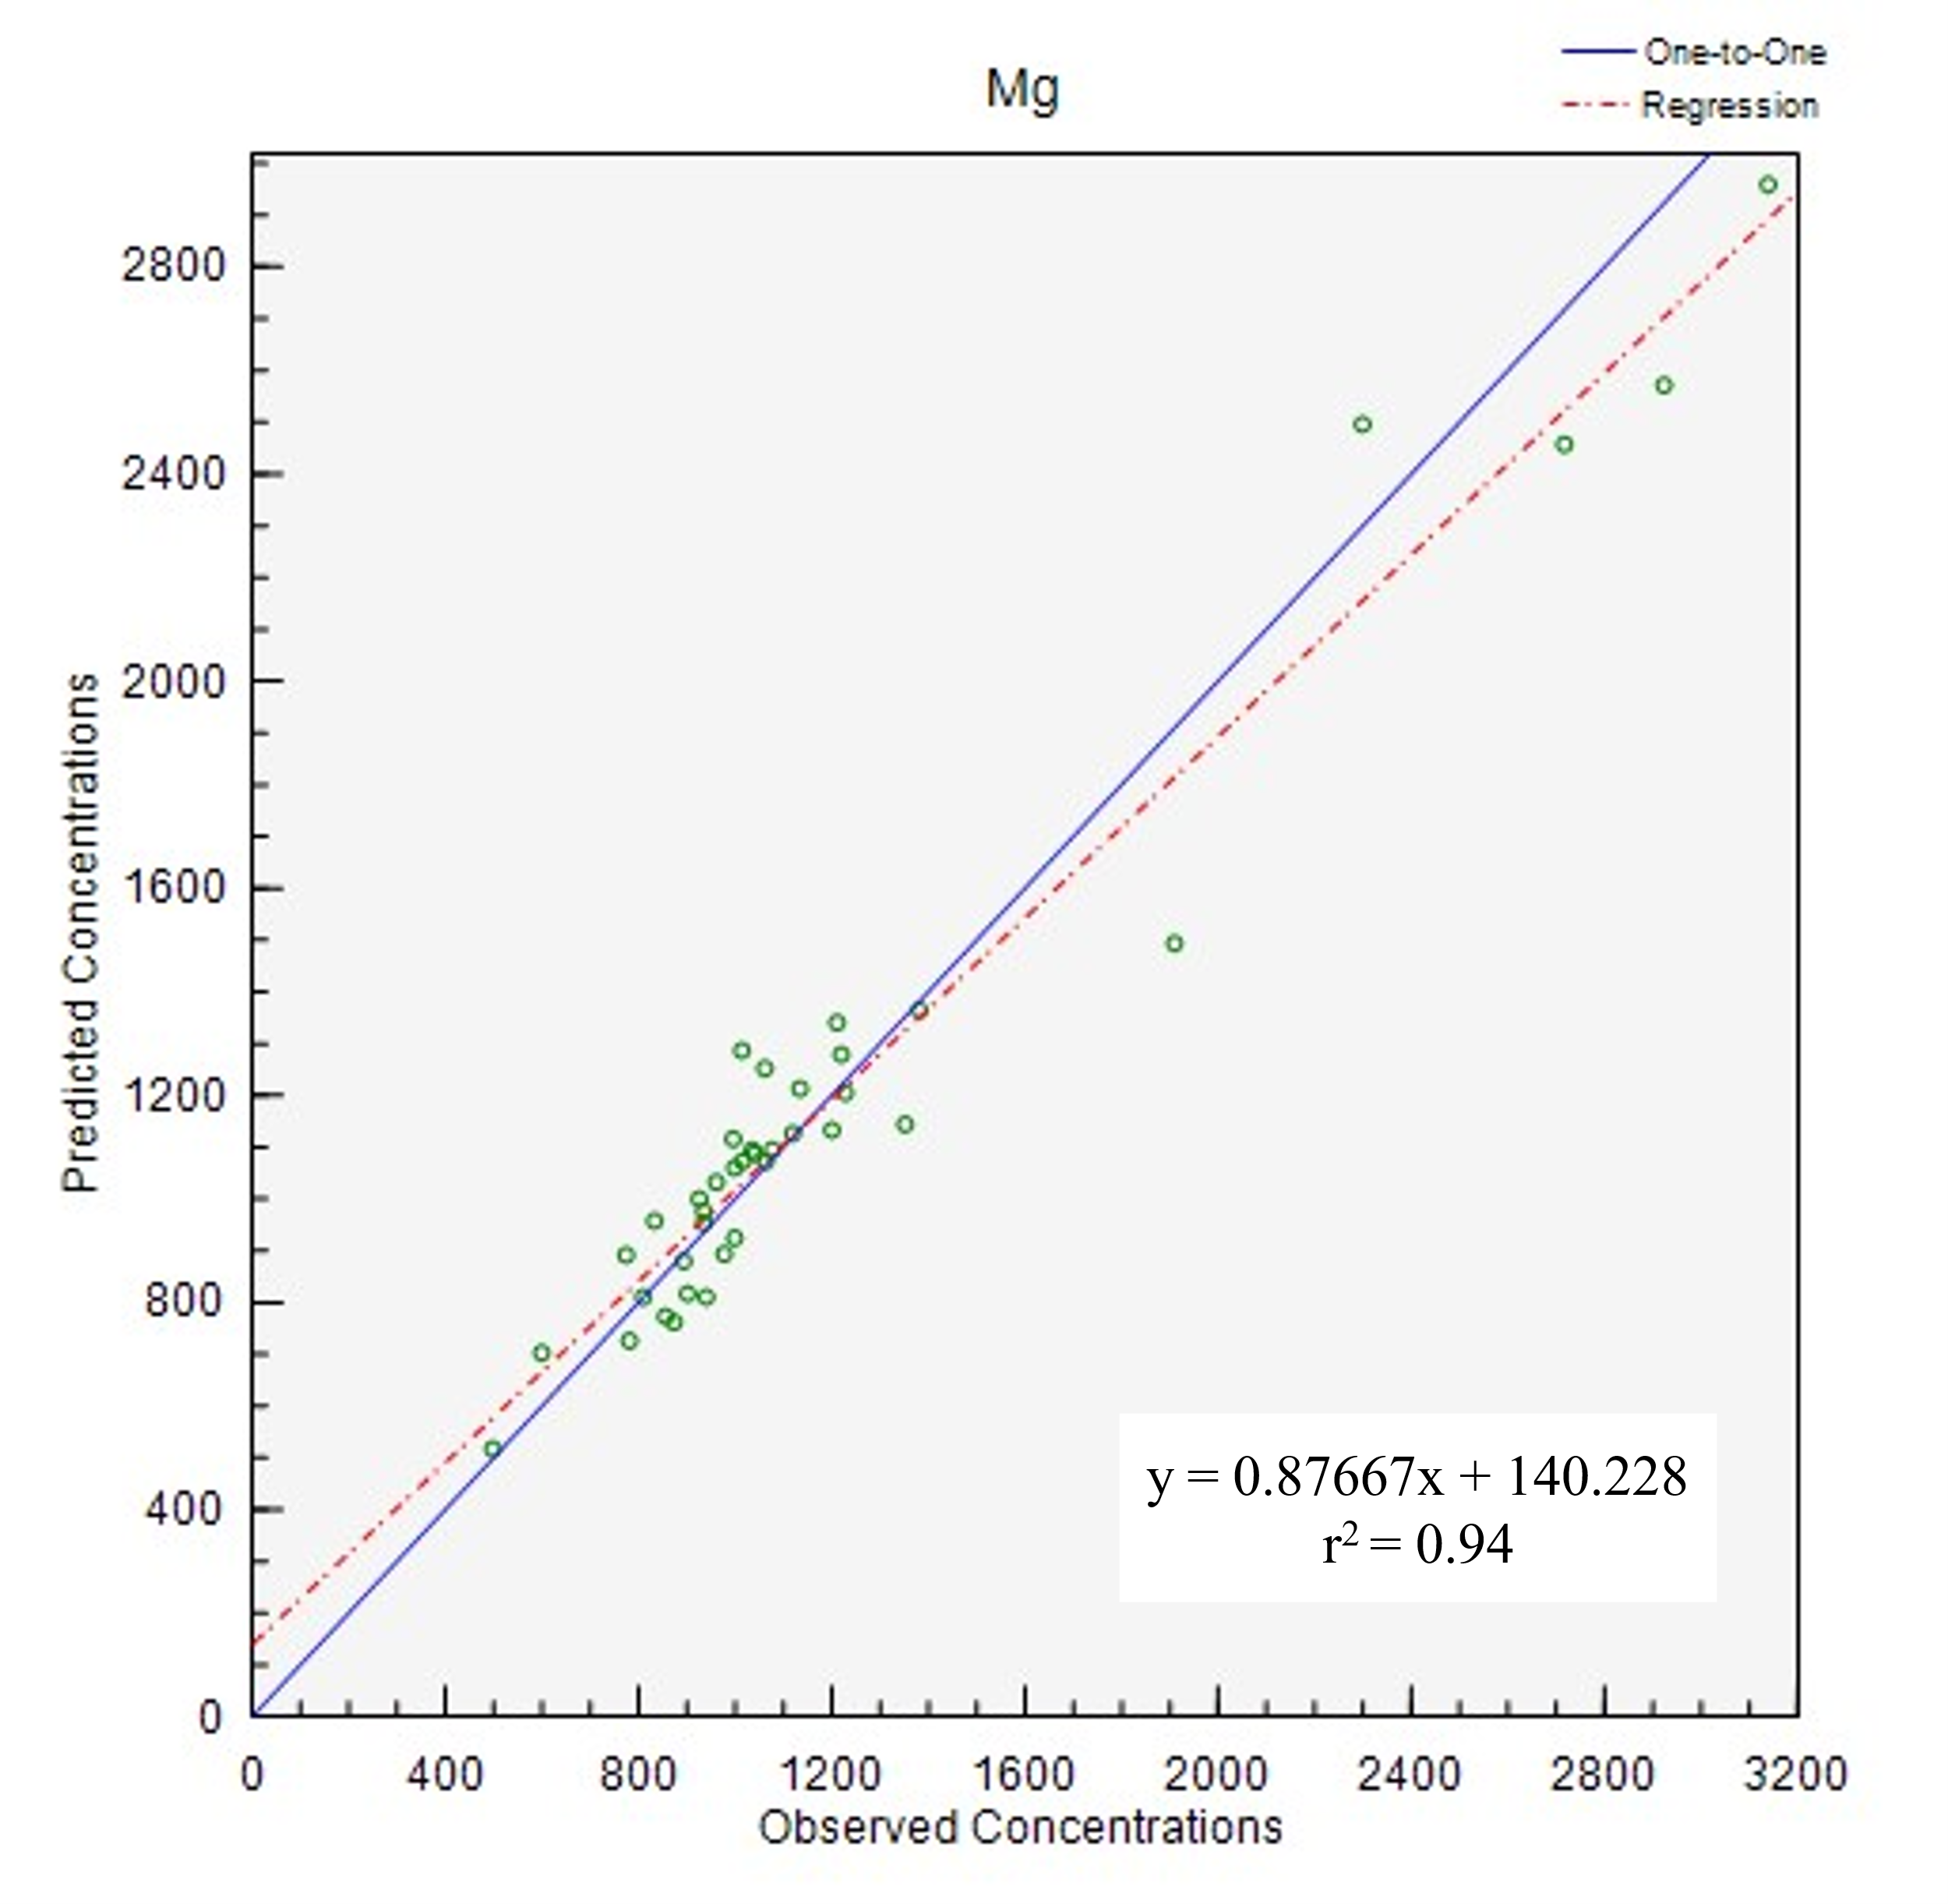

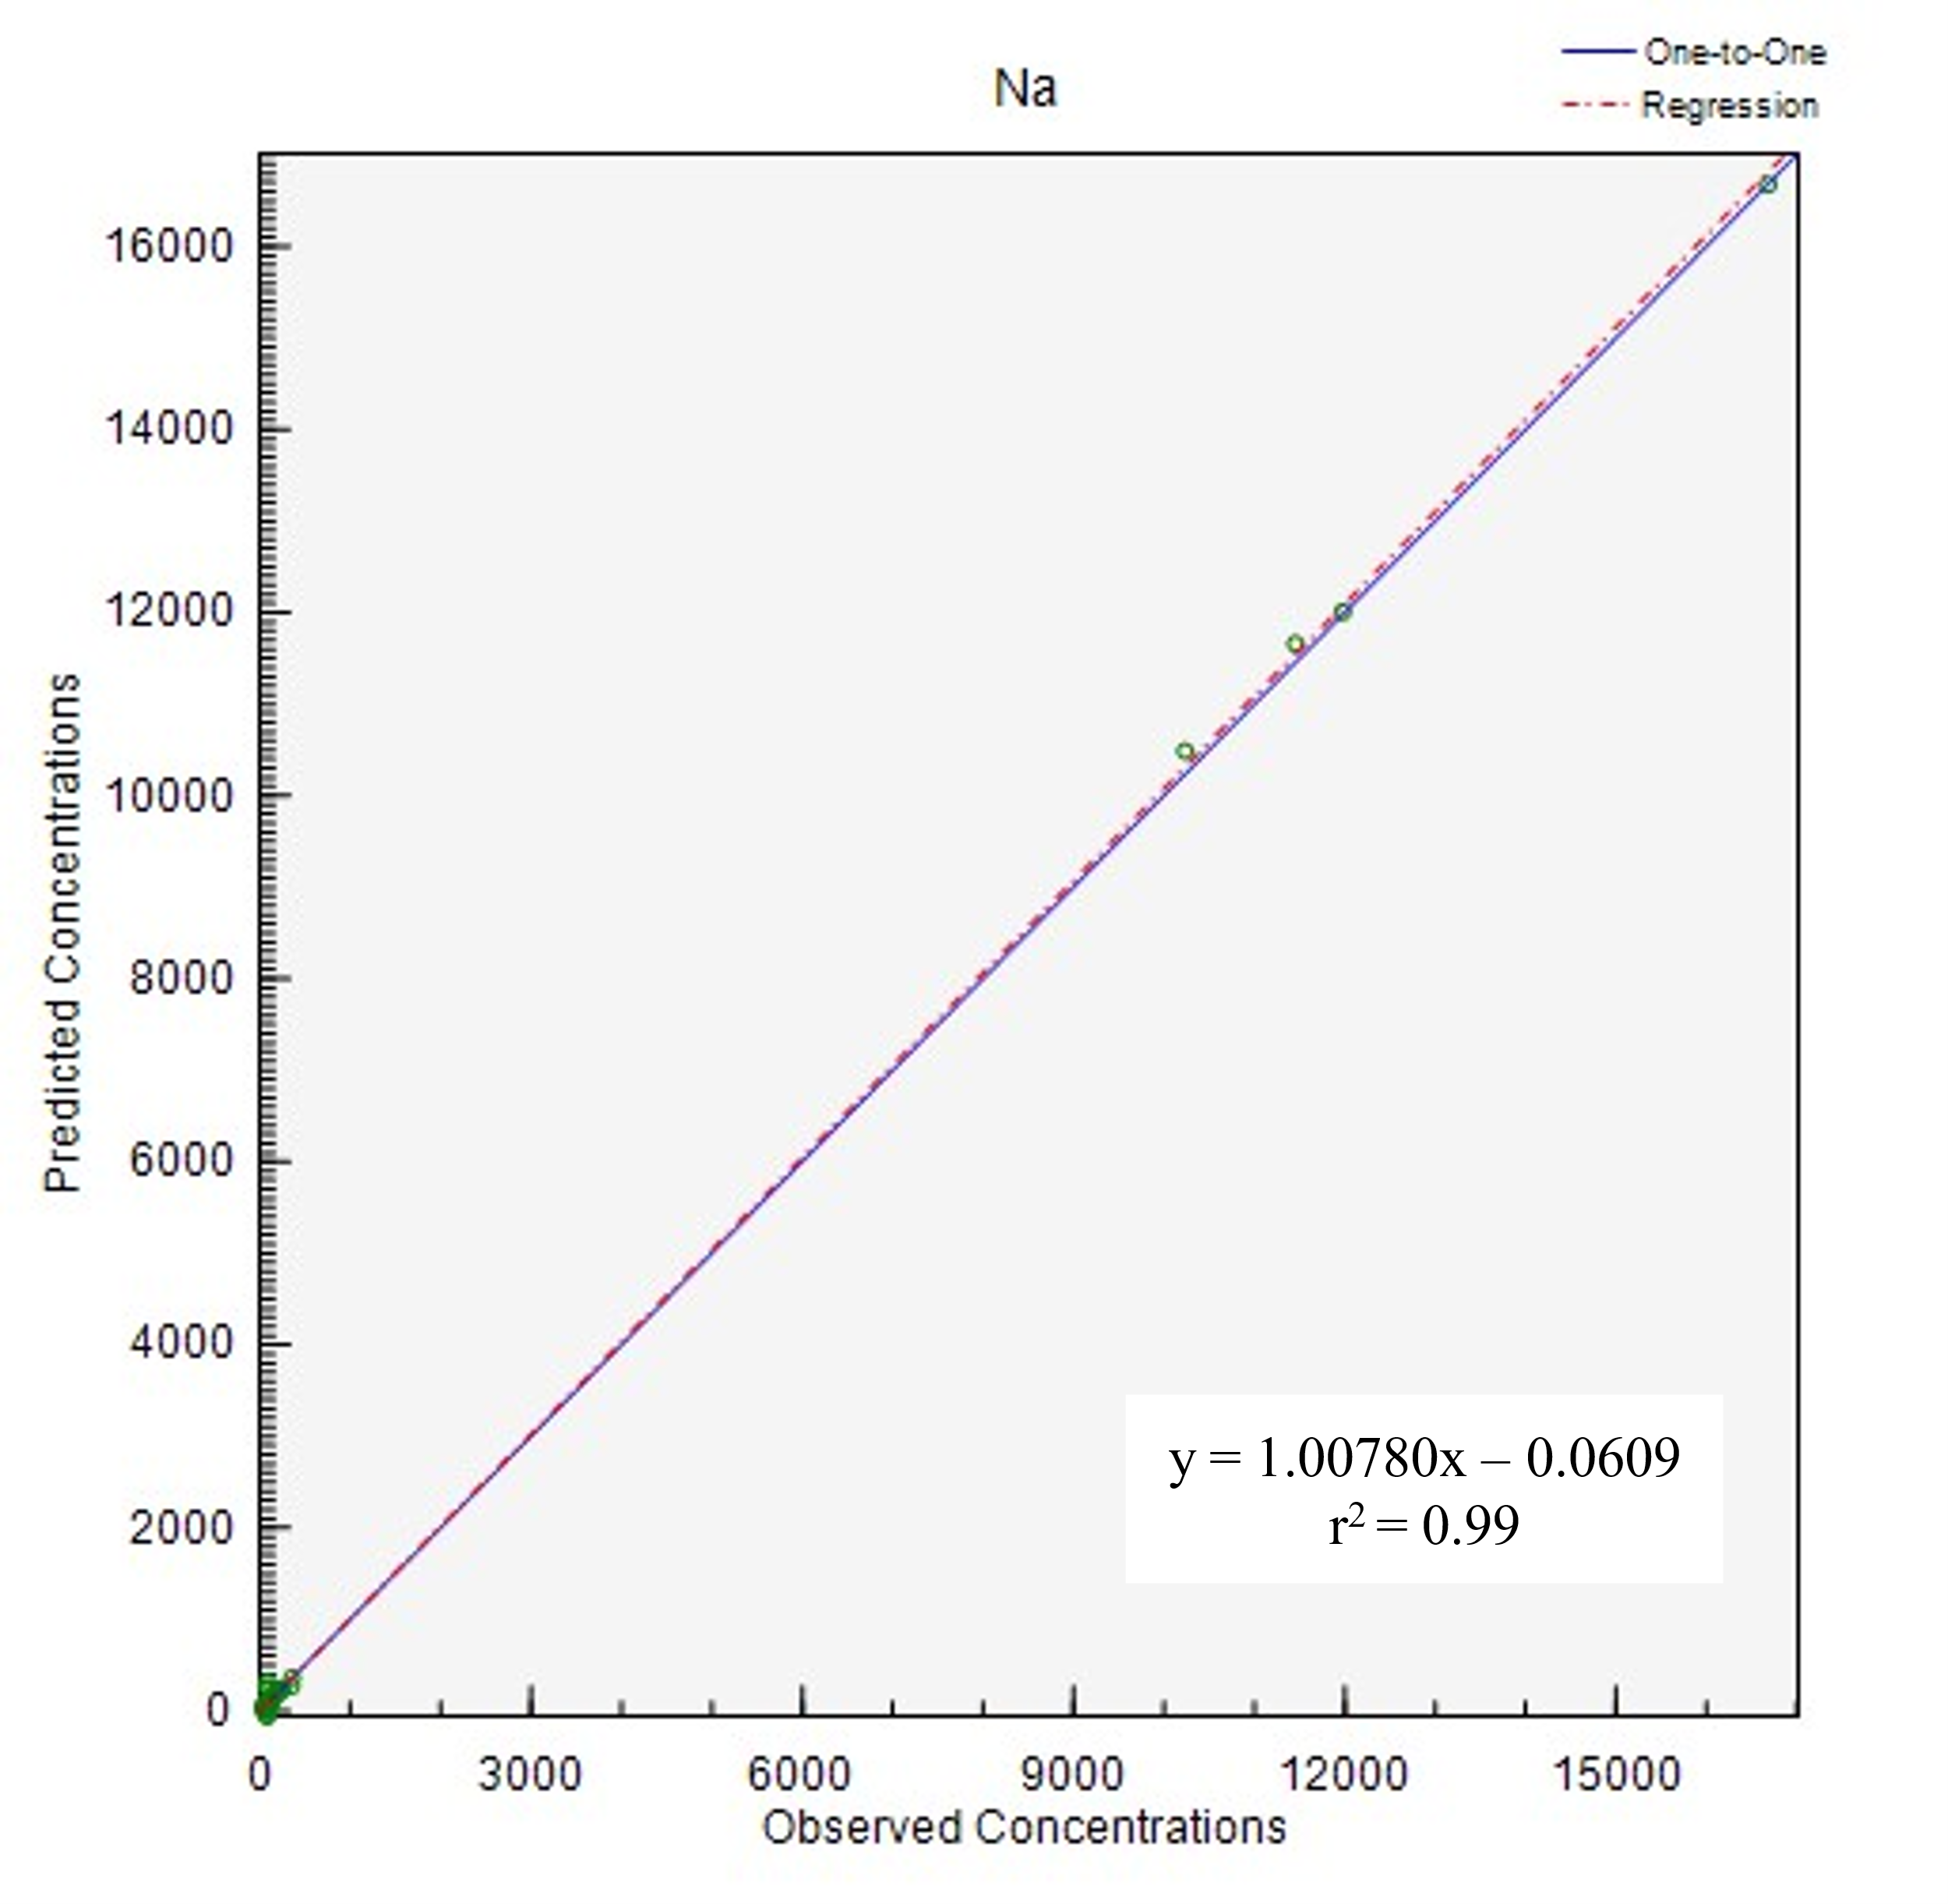


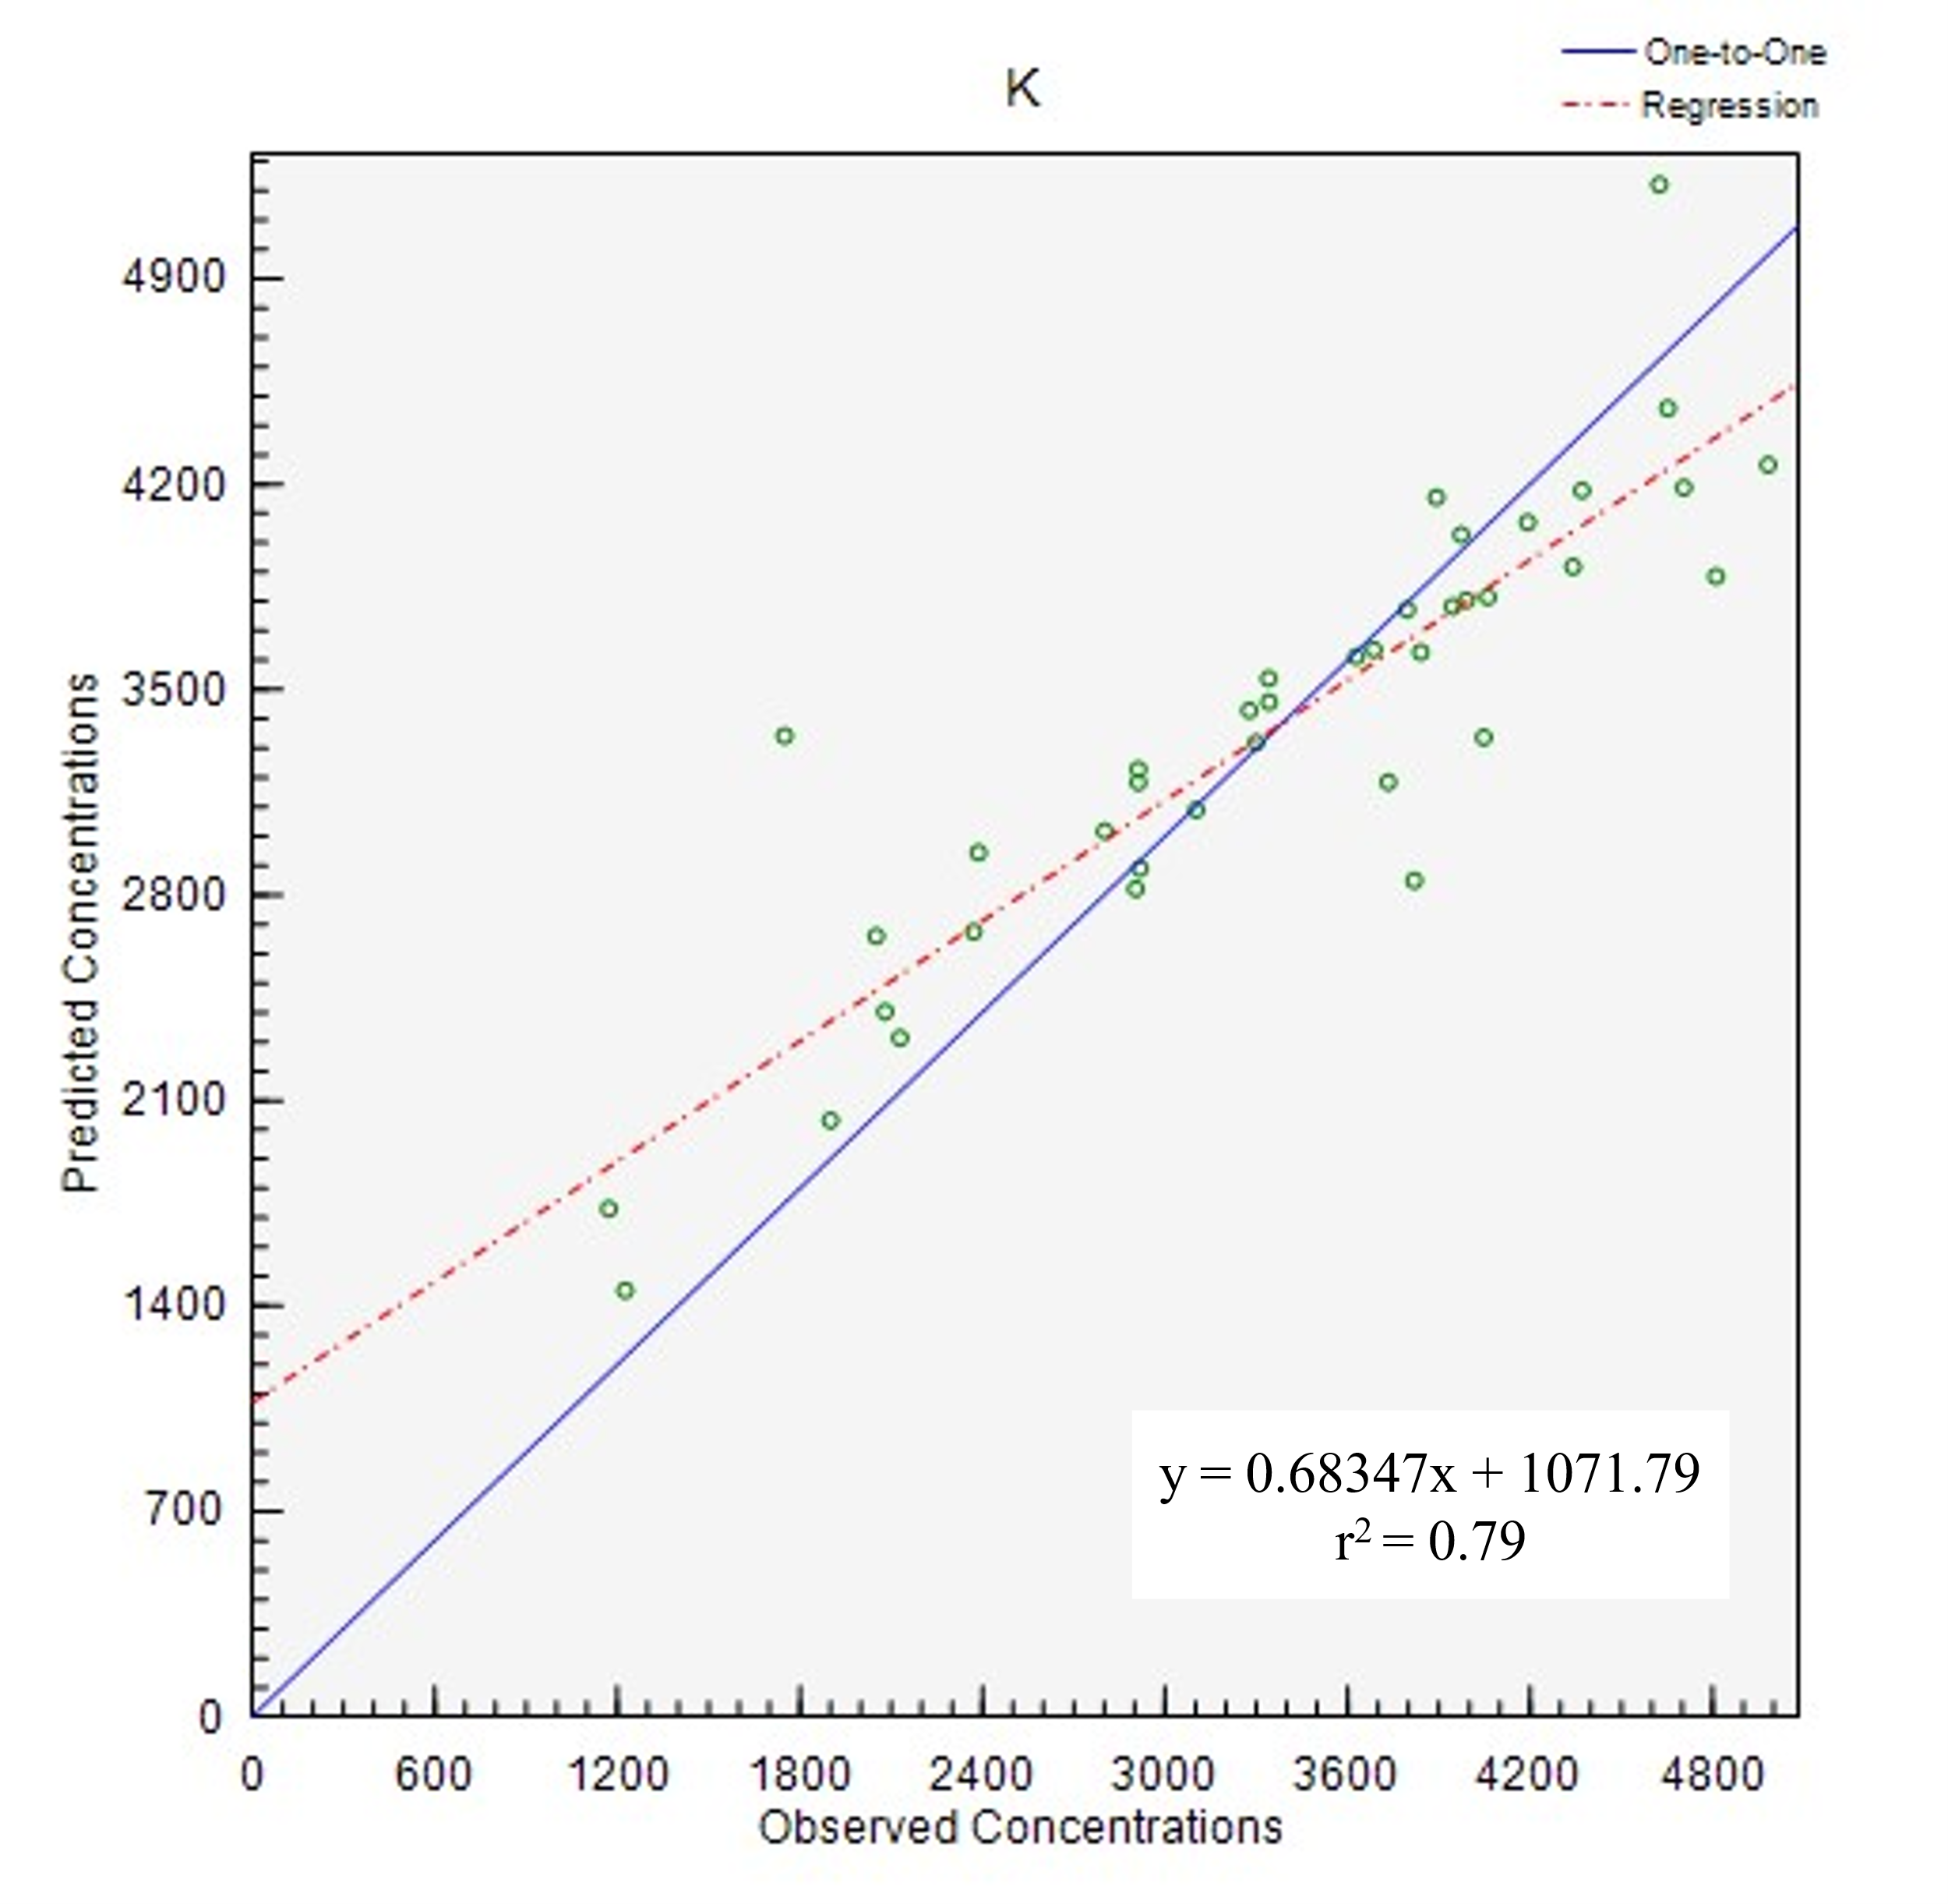

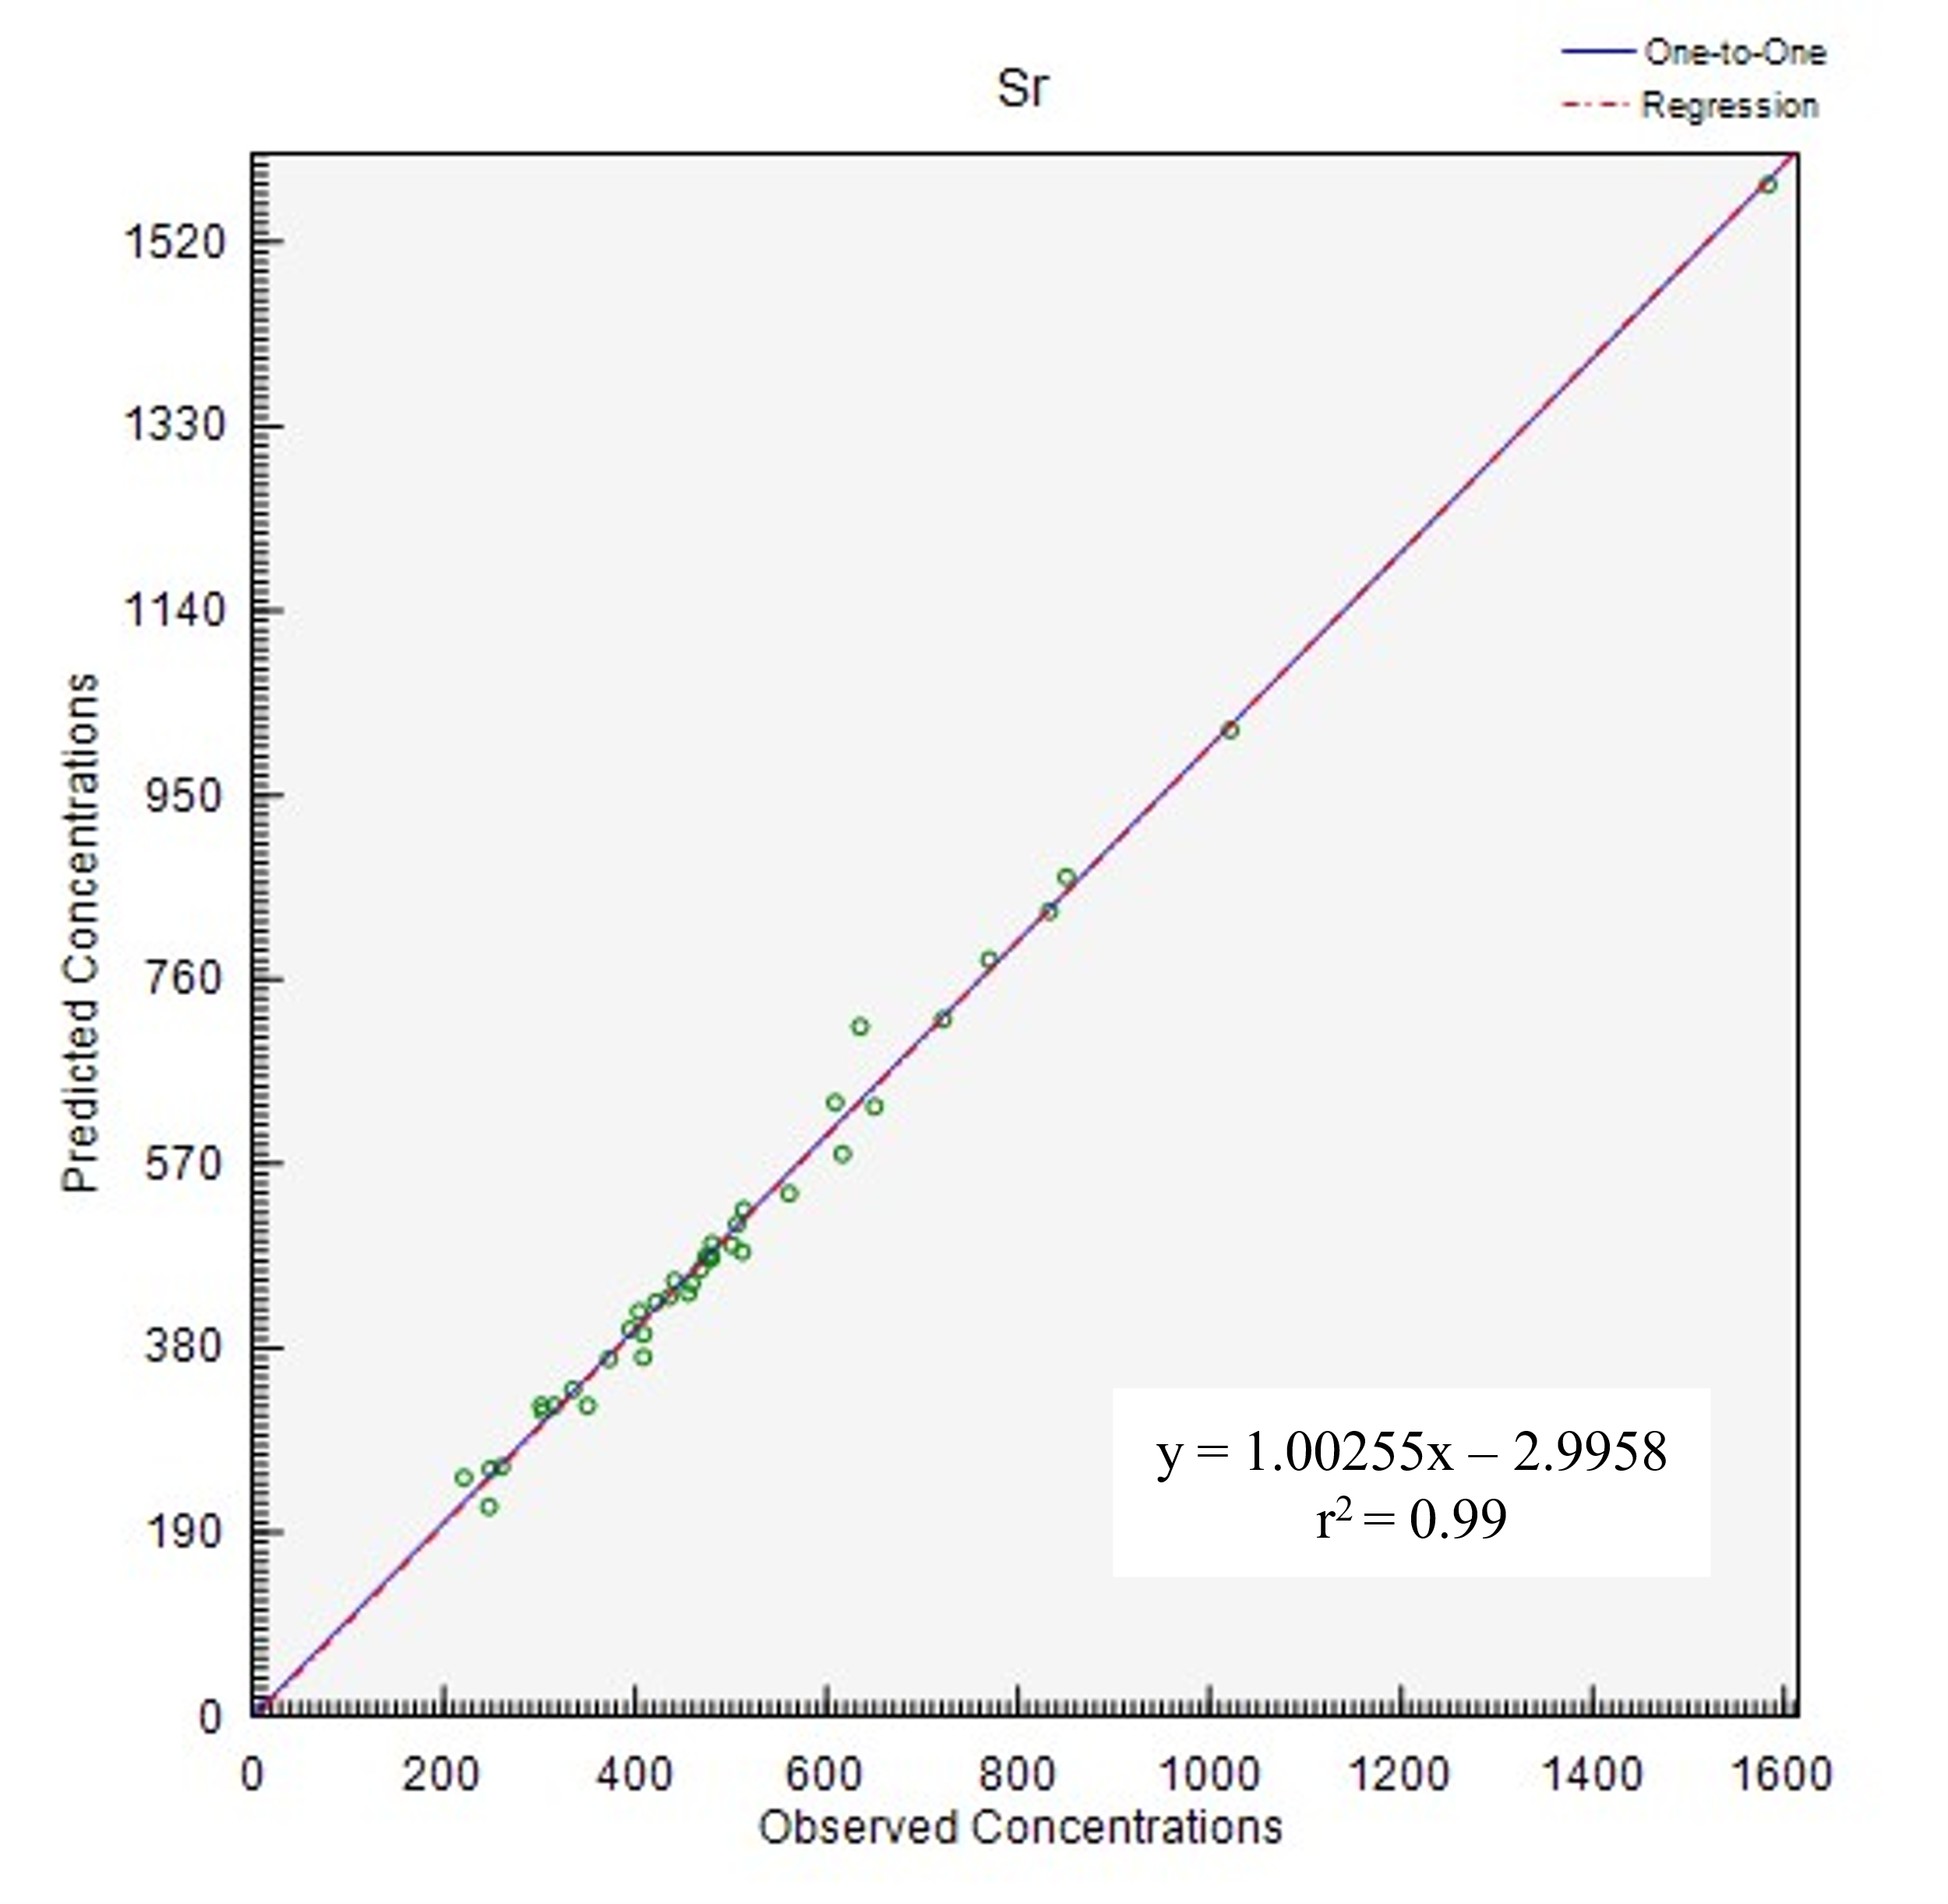

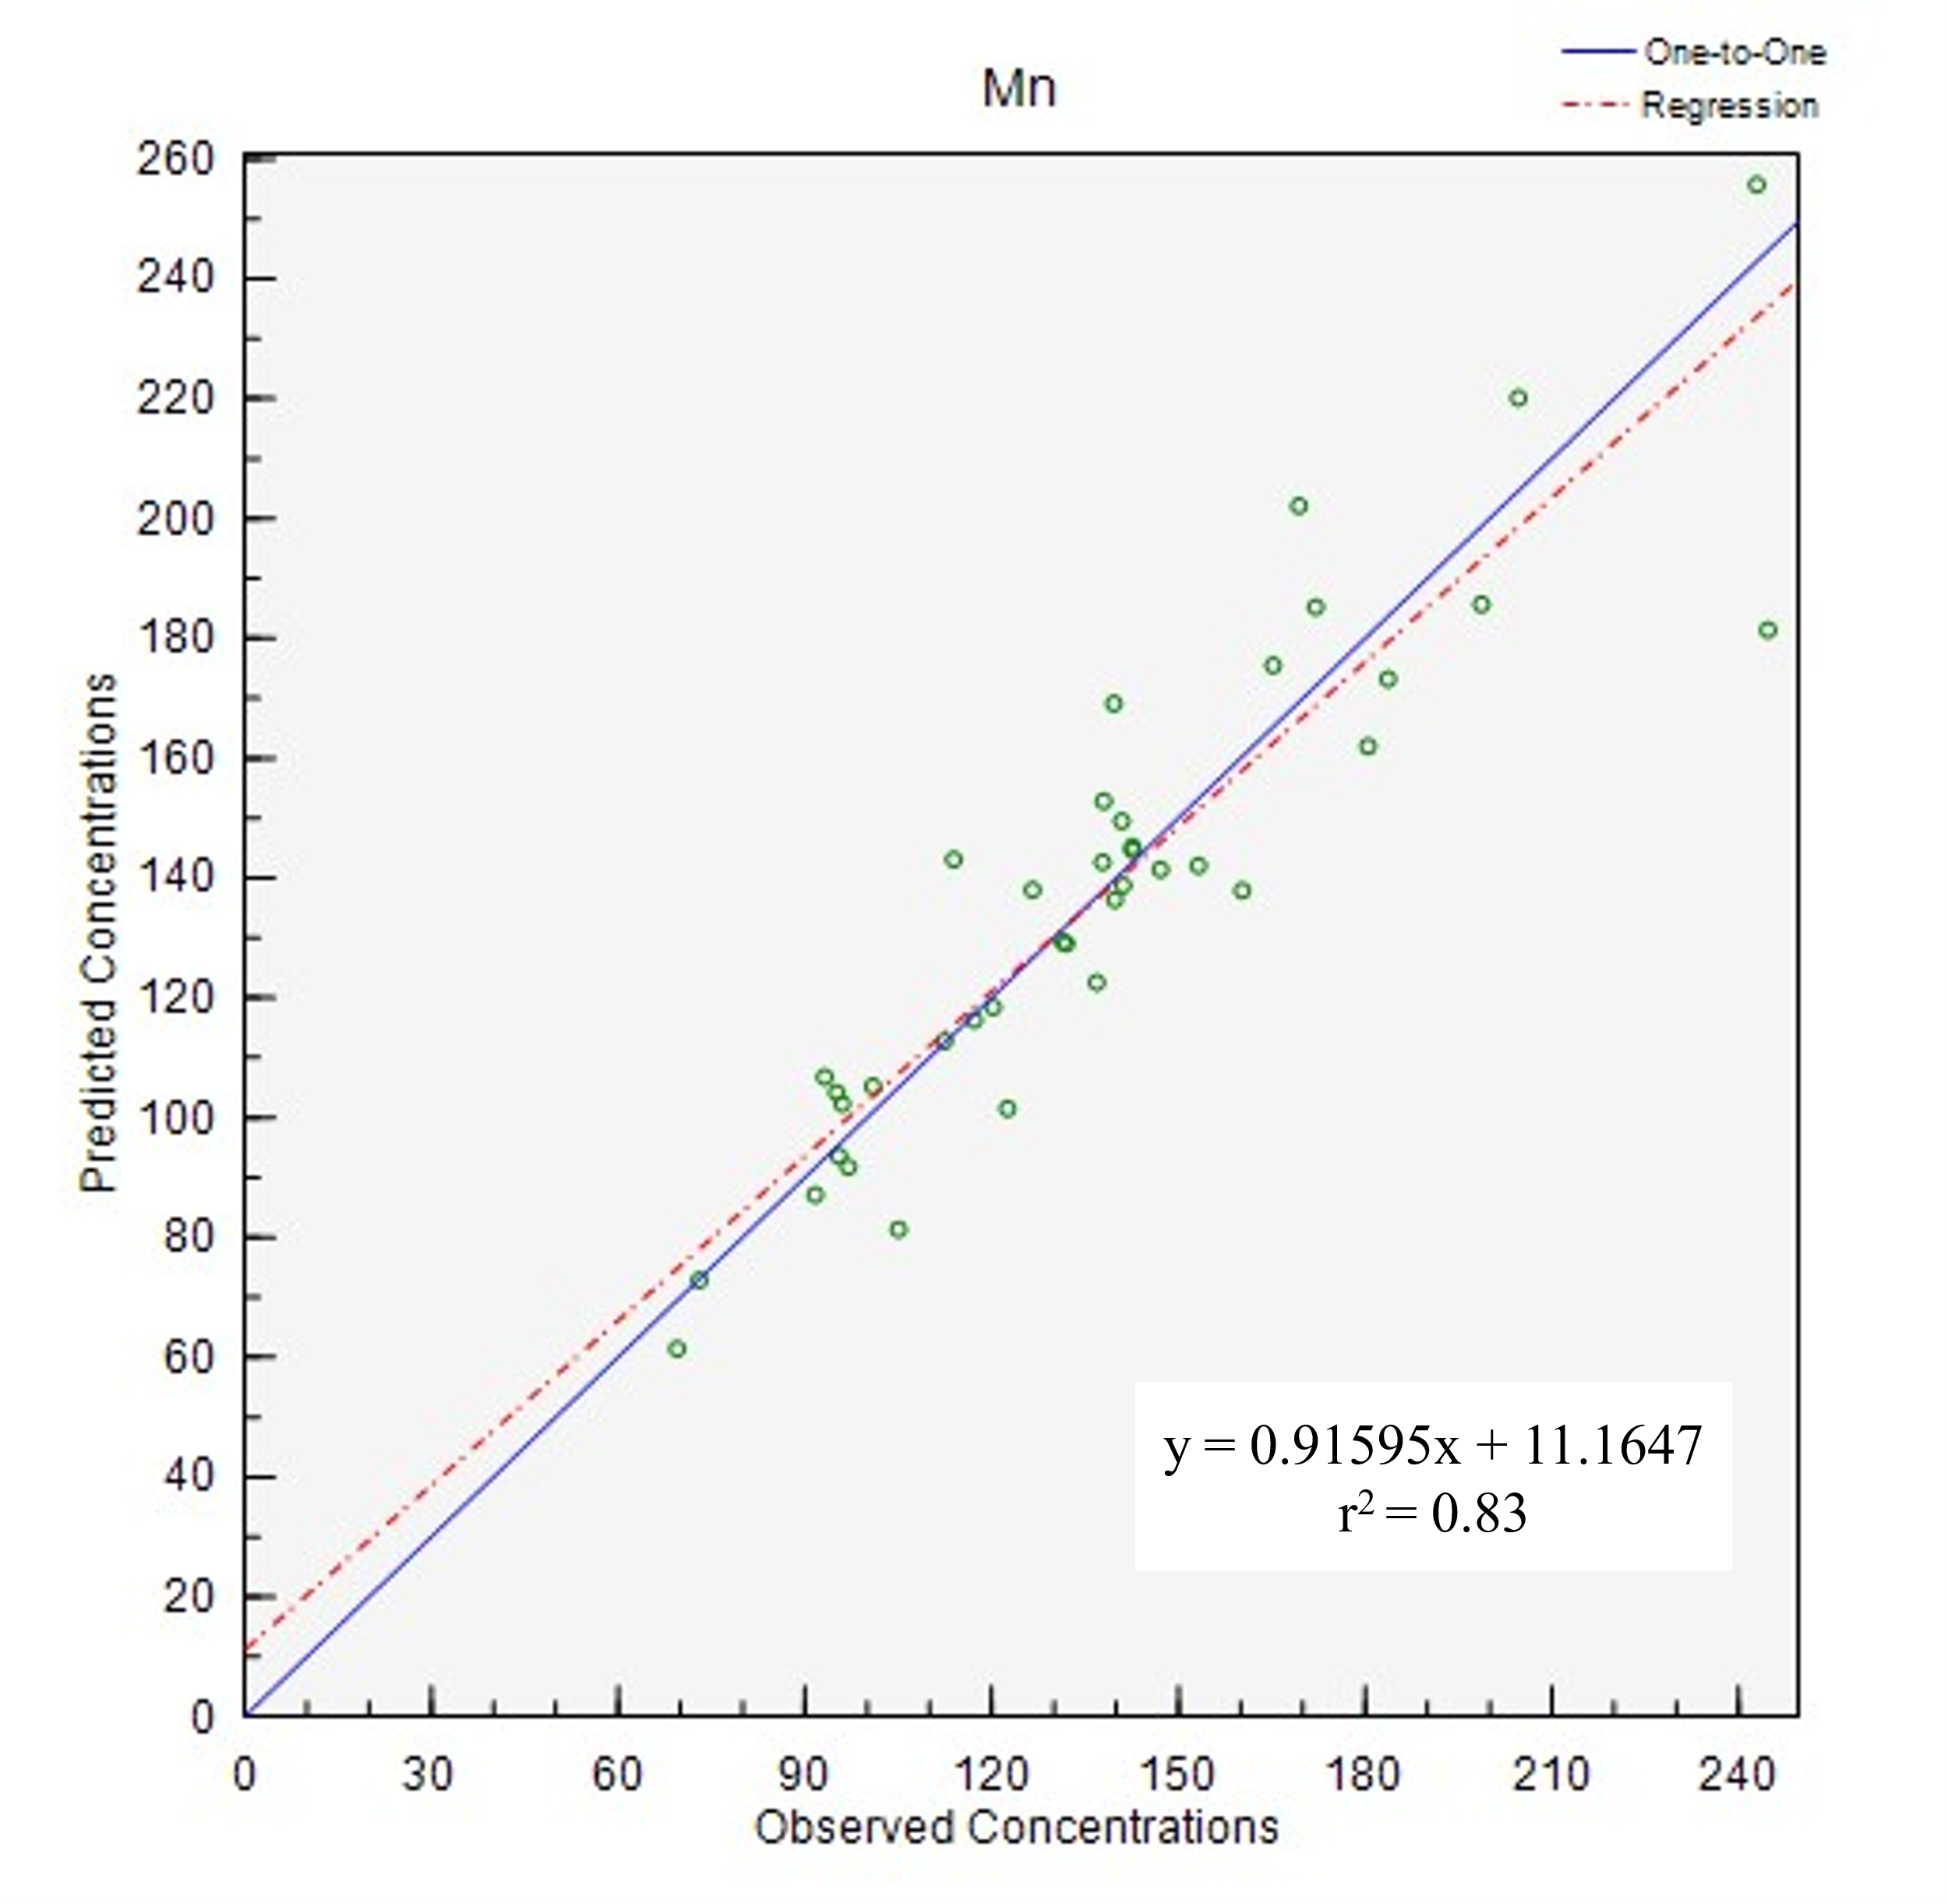

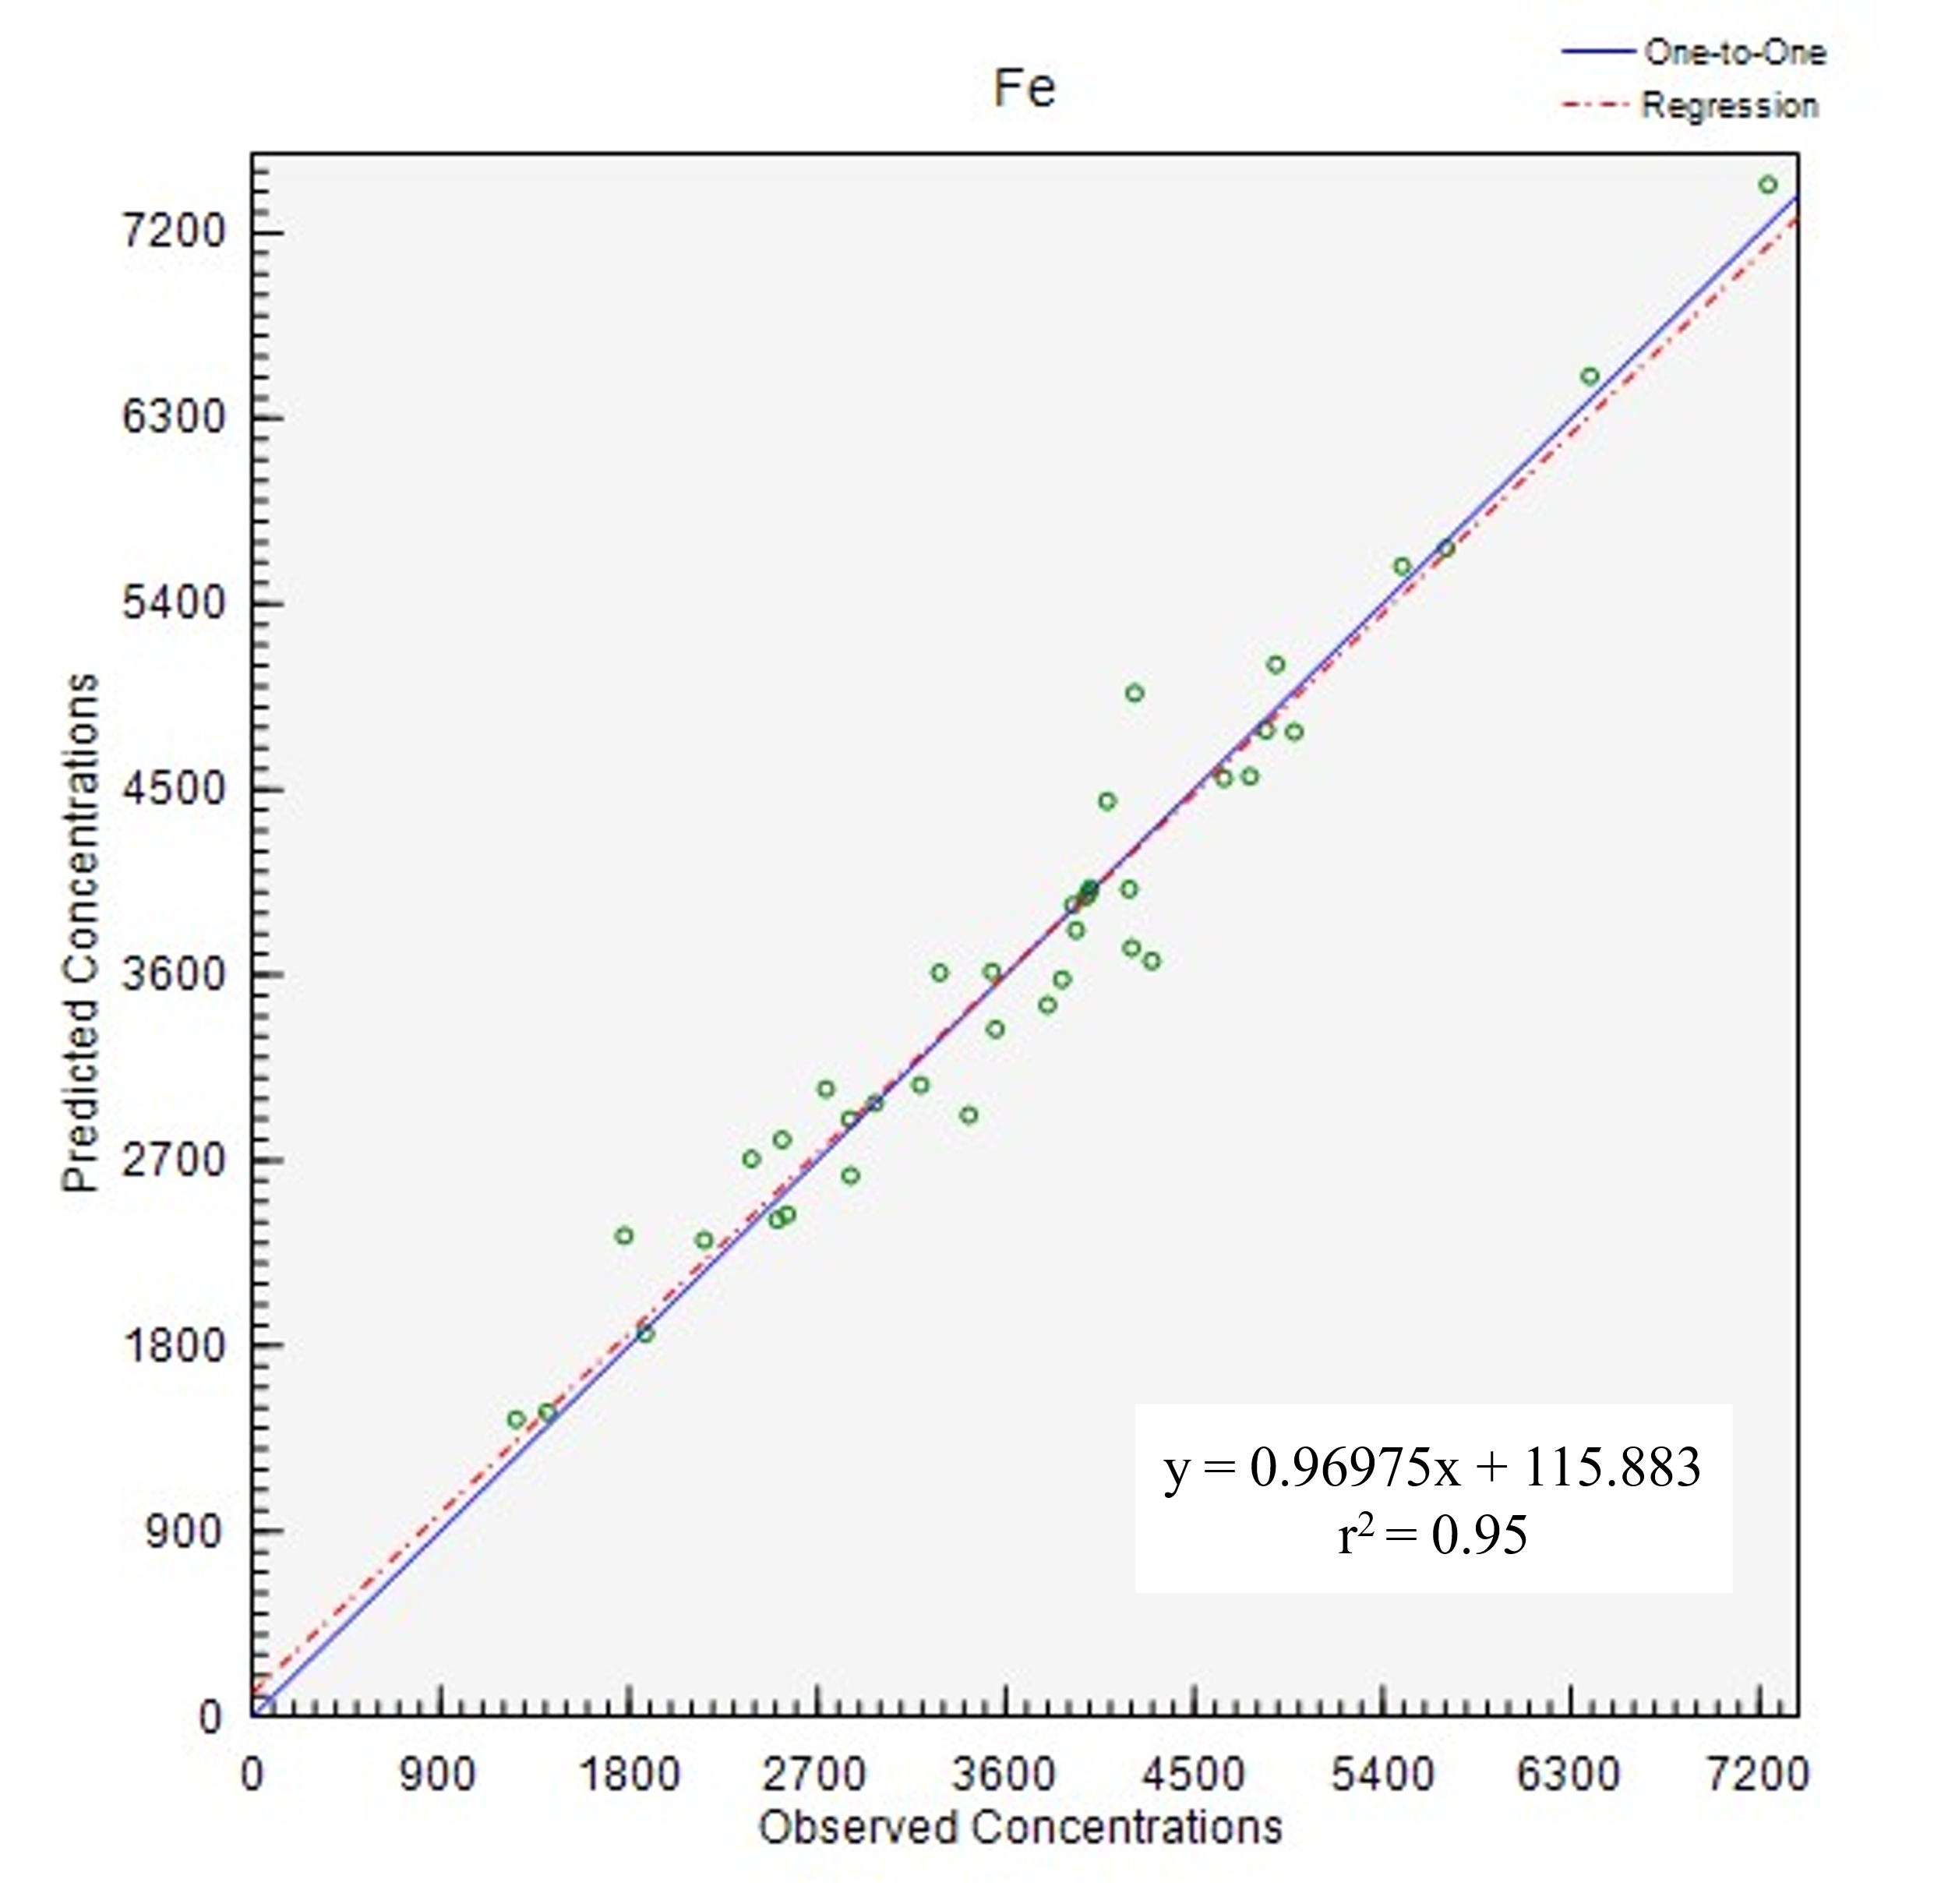


**Supplementary Figure 1:** Correlation between observed and predicted concentrations of selected metals based on the PMF method for recreational soil


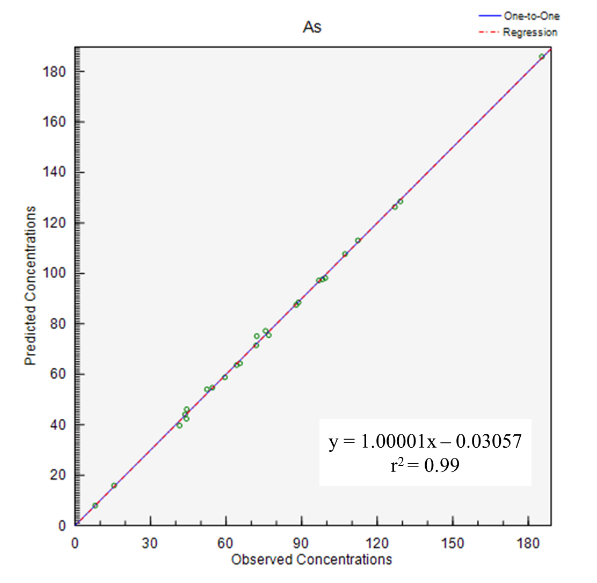

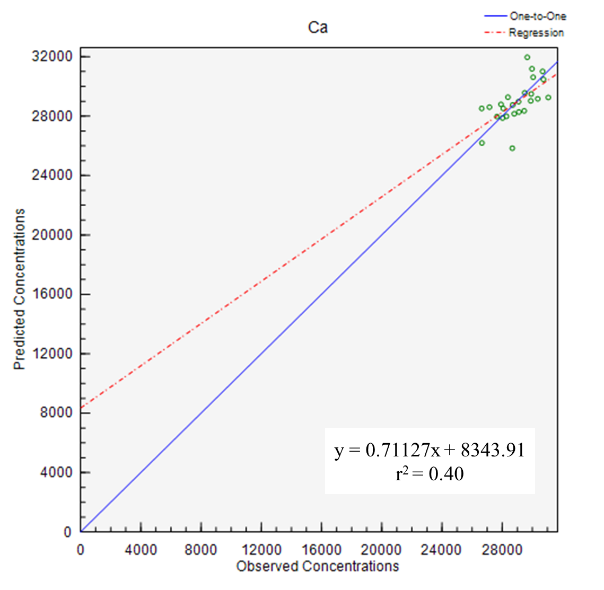

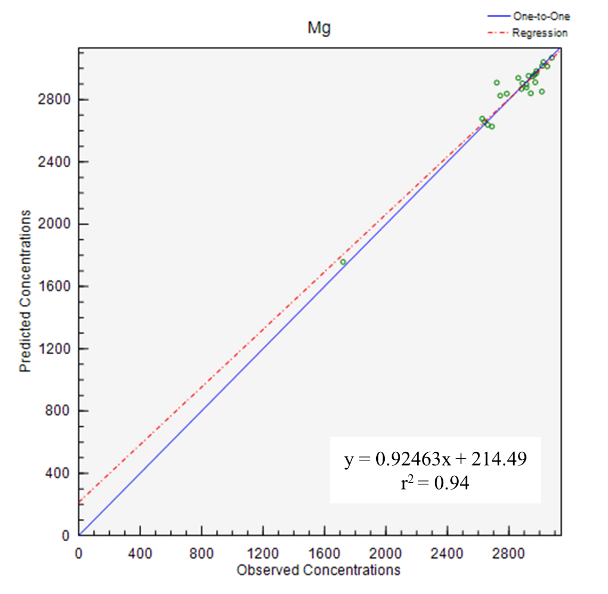

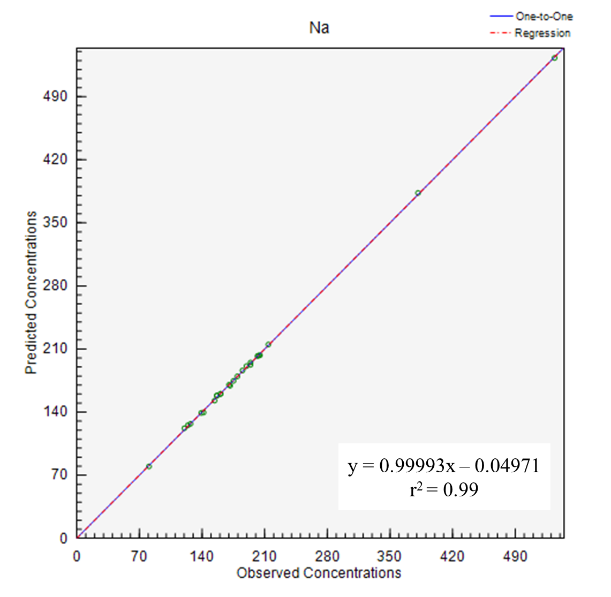


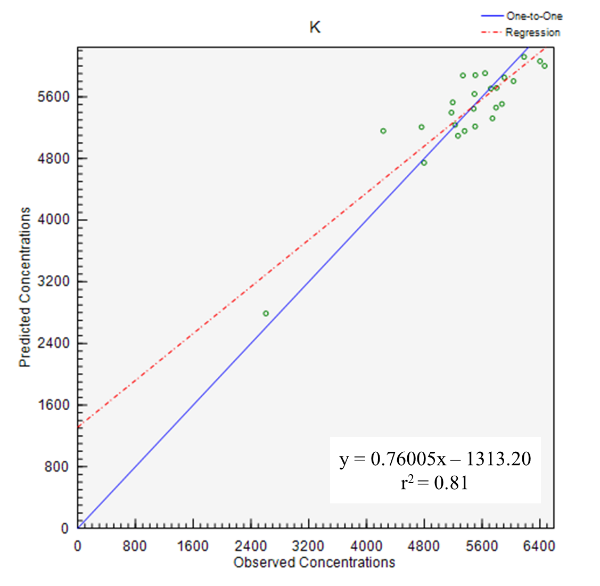

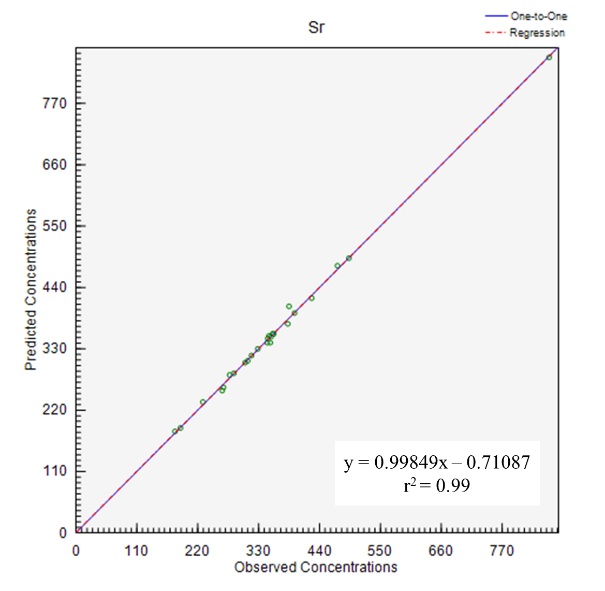

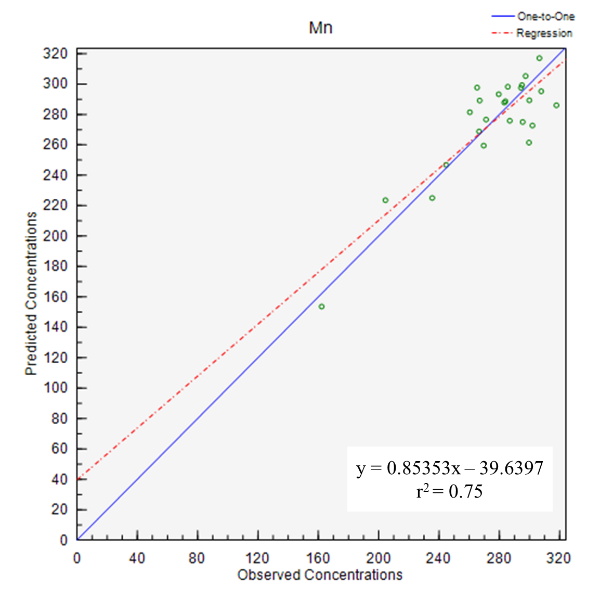

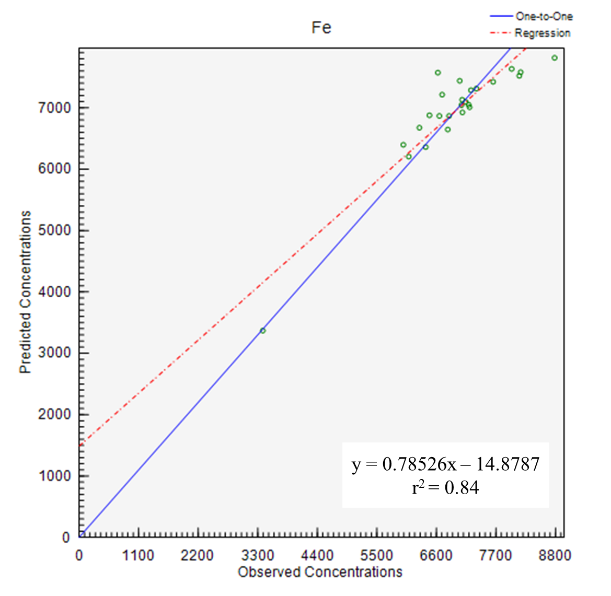


**Supplementary Figure 2**: Correlation between observed and predicted concentrations of selected metals based on the PMF method for agricultural soil
